# Supplementary material for: Encapsulation of zinc hexacyanoferrate nanocubes with manganese oxide nanosheets for high-performance rechargeable zinc ion batteries
Source: Royal Society of Chemistry journal article supplement (doi:10.1039/c7ta07834j), 2017-01-01
Supplement: c7ta07834j1.pdf [file c7ta07834j1.pdf]

## Supplementary Information

# Encapsulation of Zinc Hexacyanoferrate Nanocubes with Manganese Oxide Nanosheets for High-performance Rechargeable Zinc-ion Batteries

Ke Lu<sup>a</sup>, Bin Song<sup>b</sup>, Yuxin Zhang<sup>c</sup>, Houyi Ma<sup>a,\*</sup>, and Jintao Zhang<sup>a,\*</sup>

<sup>a</sup>Key Laboratory for Colloid and Interface Chemistry, Ministry of Education, School of Chemistry and Chemical Engineering, Shandong University, Jinan 250100, China

<sup>b</sup>Jiangsu Key Laboratory for Carbon-Based Functional Materials and Devices, Institute of Functional Nano and Soft Materials (FUNSOM), Soochow University, Suzhou 215123, China

<sup>c</sup>College of Materials Science and Engineering, Chongqing University, Chongqing, 400044, China.

\*Correspondence to:

Prof. Houyi Ma, E-mail: [hyma@sdu.edu.cn](mailto:hyma@sdu.edu.cn); Tel.: +86-531-88364959

Prof. Jintao Zhang, E-mail: [jtzhang@sdu.edu.cn](mailto:jtzhang@sdu.edu.cn); Tel.: +86-531-88361011

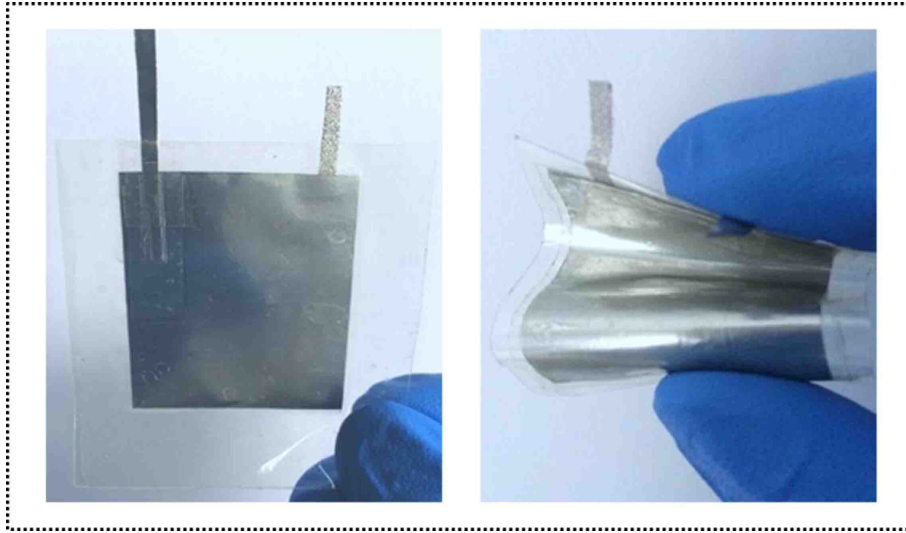

**Figure S1.** Photographs of the flexible Zn-ion battery.

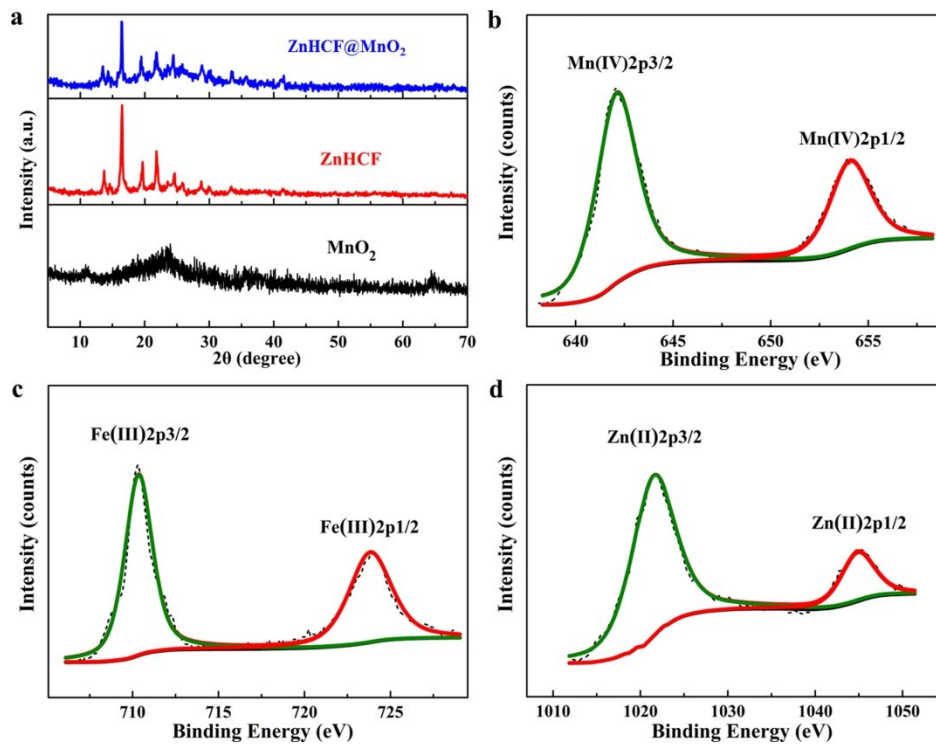

**Figure S2.** (a) XRD patterns of MnO<sub>2</sub>, ZnHCF and ZnHCF@MnO<sub>2</sub>. High-resolution XPS spectra of (b) Mn2p, (c) Fe2p, and (d) Zn2p core levels in ZnHCF@MnO<sub>2</sub>.

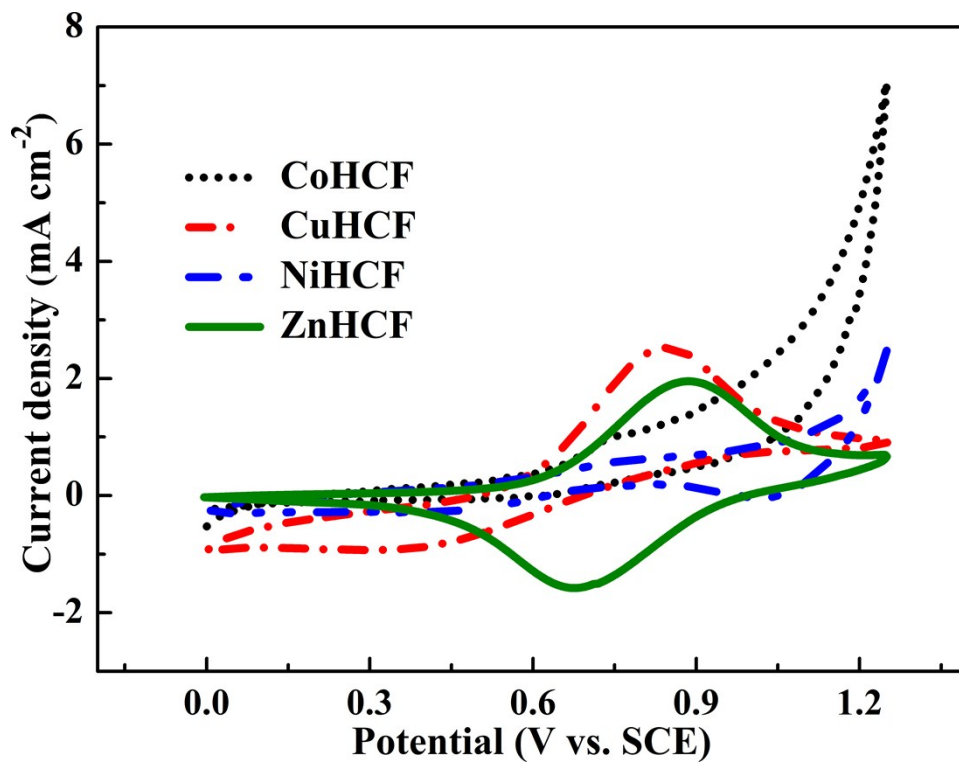

**Figure S3.** Cyclic voltammograms ( $5 \text{ mV s}^{-1}$ ) of different Prussian blue analogues in a three-electrode cell in  $\text{ZnSO}_4$  aqueous solution.

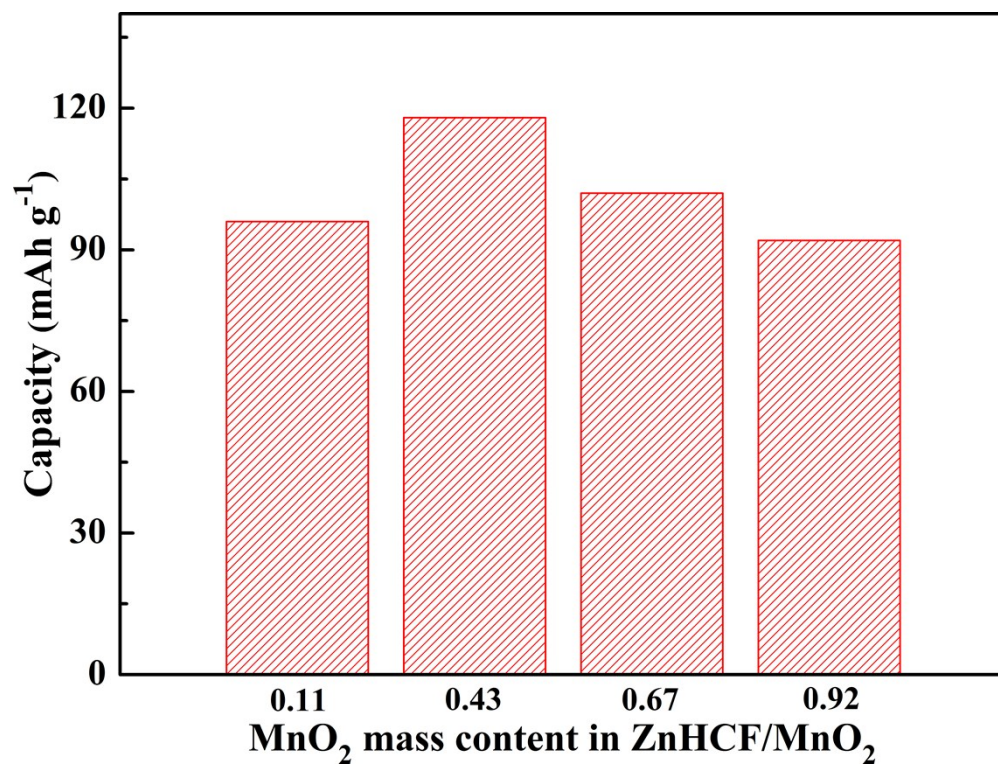

**Figure S4.** Galvanostatic charge-discharge curves of ZnHCF@MnO<sub>2</sub> composites with different amounts of MnO<sub>2</sub> at 100 mA g<sup>-1</sup>.

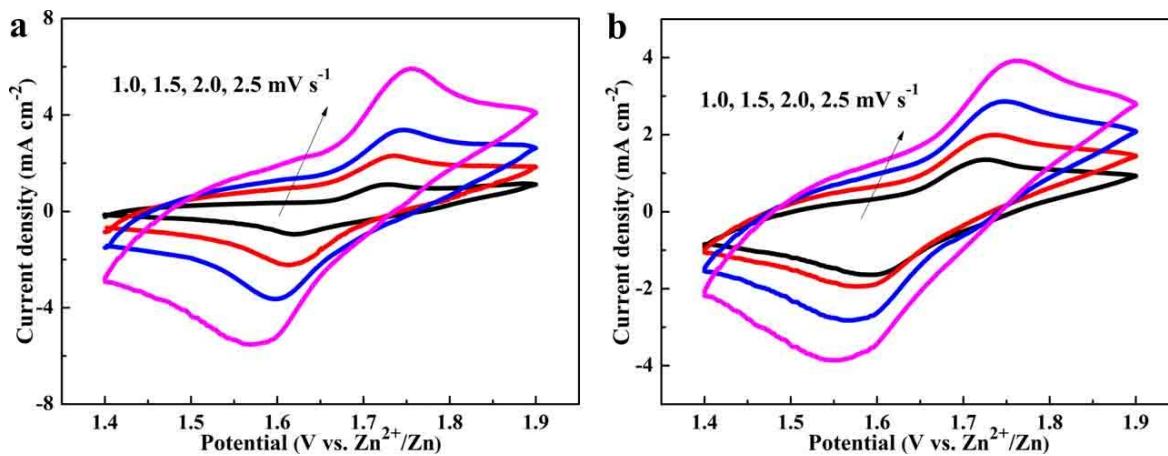

**Figure S5.** CV curves of the (a) ZnHCF and (b) MnO<sub>2</sub> in 0.5 M ZnSO<sub>4</sub> solution electrodes at different sweep rates.

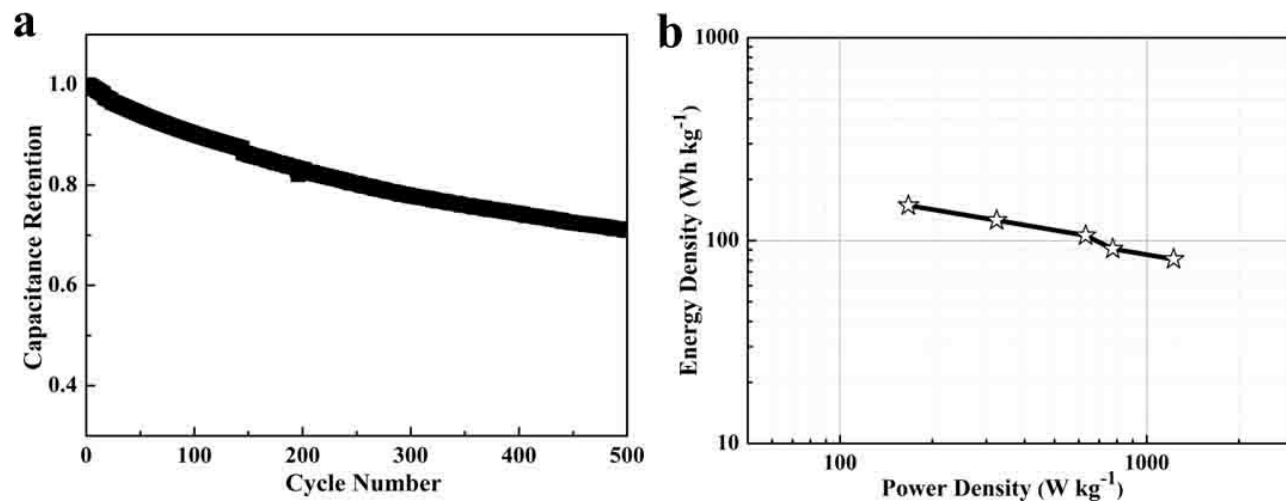

**Figure S6.** (a) Long cycling life of flexible Zn-ion batteries (400 mA g<sup>-1</sup>). (b) A Ragone plot of the flexible solid-state battery.

**Table S1** Comparison of the electrochemical performance of zinc-ion batteries.

| Zinc-ion batteries                                                    | Electrolyte    | Average operating voltage<br>(V) | Energy density (Wh<br>kg <sup>-1</sup> ) | Cycling<br>stability/cycles | Ref.                                    |
|-----------------------------------------------------------------------|----------------|----------------------------------|------------------------------------------|-----------------------------|-----------------------------------------|
| NiHCF//Zn                                                             | Aqueous        | 1.5                              | 62.9                                     | 81%/1000                    | J. Power Sources, 2016, 321, 257        |
| CuHCF//Zn                                                             | Aqueous        | 1.73                             | 56.3                                     | 96%/110                     | ChemSusChem, 2015, 8, 481               |
| Na <sub>3</sub> V <sub>2</sub> (PO <sub>4</sub> ) <sub>3</sub> /C//Zn | Aqueous        | 1.42                             | 112                                      | 68%/200                     | J. Power Sources, 2016, 308, 52         |
| V <sub>2</sub> O <sub>5</sub> //Zn                                    | Aqueous        | 0.9                              | 144                                      | 85%/120                     | Adv. Energy Mater., 2016, 6,<br>1600826 |
| NaFe-PB//Zn                                                           | Aqueous        | 1.2                              | 100                                      | 80%/1000                    | J. Power Sources, 2017, 355, 18         |
| Na <sub>0.95</sub> MnO <sub>2</sub> //Zn                              | Aqueous        | 1.5                              | 78                                       | 92%/1000                    | Chem. Commun., 2014, 50, 1209           |
| $\alpha$ -MnO <sub>2</sub> //Zn                                       | Aqueous        | 1.3                              | not shown                                | 100%/100                    | Angew. Chem. Int. Ed., 2012, 51,<br>933 |
| ZnHCF//Zn                                                             | Aqueous        | 1.7                              | 100                                      | 80%/100                     | Adv. Energy Mater., 2014,<br>1400930    |
| <b>ZnHCF@MnO<sub>2</sub>//Zn</b>                                      | <b>Solid</b>   | <b>1.7</b>                       | <b>149</b>                               | <b>71%/500</b>              | <b>This work</b>                        |
|                                                                       | <b>Aqueous</b> | <b>1.7</b>                       | <b>-</b>                                 | <b>77%/1000</b>             |                                         |
